# Supplementary material for: Prognostic Biomarker KIF18A and Its Correlations With Immune Infiltrates and Mitosis in Glioma
Source: Front Genet. 2022 May 3;13:852049. doi: 10.3389/fgene.2022.852049 (PMC9110815; doi:10.3389/fgene.2022.852049)
Supplement: Supplementary file 2 [file Table1.XLSX]

## Sheet: Sheet1
Term	Node	Description	Hits
Cell Cycle	node1	Cell Cycle	BIRC5|BUB1|BUB1B|CCNA2|CCNB1|CDK1|CDC6|CDC20|CDC25C|CDKN2C|CENPA|CENPE|CENPF|E2F2|FOXM1|HMMR|MYBL2|NEK2|ORC1|RAD51|RRM2|AURKA|TK1|TOP2A|TYMS|CDC45|H2AC14|H2AC18|H2BC14|H2BC9|H2BC10|H3C11|H3C8|H4C1|H3C7|CCNB2|EXO1|AURKB|PTTG1|KIF23|ESPL1|KIF20A|NDC80|KIF2C|UBE2C|OIP5|TPX2|NCAPH|GTSE1|ERCC6L|CDCA8|HJURP|MCM10|KNL1|CLSPN|CENPK|NCAPG|CENPU|NUF2|BRIP1|MND1|TUBA1C|SPC24|SGO1|ESCO2|SKA1|H4C15|H2AC19
Cell Cycle	node2	M Phase	BIRC5|BUB1|BUB1B|CCNB1|CDK1|CDC20|CENPA|CENPE|CENPF|NEK2|H2AC14|H2AC18|H2BC14|H2BC9|H2BC10|H3C11|H3C8|H4C1|H3C7|CCNB2|AURKB|PTTG1|KIF23|ESPL1|KIF20A|NDC80|KIF2C|UBE2C|NCAPH|ERCC6L|CDCA8|KNL1|CENPK|NCAPG|CENPU|NUF2|TUBA1C|SPC24|SGO1|SKA1|H4C15|H2AC19
Cell Cycle	node3	Cell Cycle Checkpoints	BIRC5|BUB1|BUB1B|CCNA2|CCNB1|CDK1|CDC6|CDC20|CDC25C|CENPA|CENPE|CENPF|ORC1|CDC45|H2BC14|H2BC9|H2BC10|H4C1|CCNB2|EXO1|AURKB|NDC80|KIF2C|UBE2C|GTSE1|ERCC6L|CDCA8|MCM10|KNL1|CLSPN|CENPK|CENPU|NUF2|BRIP1|SPC24|SGO1|SKA1|H4C15
Cell Cycle	node4	Cell Cycle, Mitotic	BIRC5|BUB1|BUB1B|CCNA2|CCNB1|CDK1|CDC6|CDC20|CDC25C|CDKN2C|CENPA|CENPE|CENPF|E2F2|FOXM1|HMMR|MYBL2|NEK2|ORC1|RRM2|AURKA|TK1|TOP2A|TYMS|CDC45|H2AC14|H2AC18|H2BC14|H2BC9|H2BC10|H3C11|H3C8|H4C1|H3C7|CCNB2|AURKB|PTTG1|KIF23|ESPL1|KIF20A|NDC80|KIF2C|UBE2C|TPX2|NCAPH|GTSE1|ERCC6L|CDCA8|MCM10|KNL1|CENPK|NCAPG|CENPU|NUF2|TUBA1C|SPC24|SGO1|ESCO2|SKA1|H4C15|H2AC19
Cell Cycle	node5	nuclear chromosome segregation	BUB1|BUB1B|CCNB1|CDC20|CENPE|CENPF|KIFC1|NEK2|TOP2A|TTK|AURKB|PTTG1|KIF23|ESPL1|DLGAP5|KIF14|NDC80|KIF2C|NCAPH|KIF4A|NUSAP1|CDCA8|KNL1|CENPK|NCAPG|FAM83D|NUF2|HASPIN|BRIP1|SPC24|SGO1|ESCO2
Cell Cycle	node6	mitotic cell cycle	BCAT1|BUB1|BUB1B|CAMK2A|CCNA2|CCNB1|CDK1|CDC6|CDC20|CDC25C|CDKN3|CENPA|CENPE|CENPF|FOXM1|KIFC1|MYBL2|NEK2|ORC1|RAD51|AURKA|TTK|HMGA2|CDC45|CCNB2|AURKB|KIF23|ESPL1|DLGAP5|MELK|KIF14|KIF20A|NDC80|TACC3|KIF2C|UBE2C|TPX2|NCAPH|KIF4A|NUSAP1|GTSE1|DTL|CDCA8|CEP55|PBK|USP29|CLSPN|CENPK|NCAPG|E2F8|NUF2|HASPIN|TUBA1C|IQGAP3|E2F7|SGO1|SKA1|SKA3|WDR62
Cell Cycle	node7	cell division	BUB1|BUB1B|CCNA2|CCNB1|CDK1|CDC6|CDC20|CDC25C|CENPA|CENPE|CENPF|HOXB4|KIFC1|NEK2|AURKA|TOP2A|HMGA2|CCNB2|AURKB|PTTG1|KIF23|ESPL1|KIF14|KIF20A|NDC80|TACC3|KIF2C|UBE2C|OIP5|TPX2|NCAPH|KIF4A|NUSAP1|PIMREG|ERCC6L|CEP55|KNL1|NCAPG|FAM83D|NUF2|BRIP1|TUBA1C|SPC24|SGO1|CDCA2|SKA1|SKA3|ASPM|SEPTIN14
Cell Cycle	node8	nuclear division	BUB1|BUB1B|CCNB1|CDC20|CENPE|EREG|KIFC1|MYBL2|NEK2|RAD51|AURKA|TOP2A|TTK|RAD54L|CCNB2|AURKB|PTTG1|KIF23|ESPL1|DLGAP5|KIF14|NDC80|KIF2C|UBE2C|TPX2|NCAPH|KIF4A|NUSAP1|CDCA8|CENPK|NCAPG|NUF2|HASPIN|BRIP1|MND1|SGO1|ASPM
Cell Cycle	node9	mitotic cell cycle process	BCAT1|BUB1|BUB1B|CAMK2A|CCNA2|CCNB1|CDK1|CDC6|CDC20|CDC25C|CDKN3|CENPA|CENPE|CENPF|FOXM1|KIFC1|MYBL2|NEK2|ORC1|RAD51|AURKA|TTK|HMGA2|CDC45|CCNB2|AURKB|KIF23|ESPL1|DLGAP5|MELK|KIF14|KIF20A|NDC80|TACC3|KIF2C|UBE2C|TPX2|NCAPH|KIF4A|NUSAP1|GTSE1|DTL|CDCA8|CEP55|USP29|CLSPN|CENPK|NCAPG|NUF2|HASPIN|IQGAP3|E2F7|SGO1|WDR62
Cell Cycle	node10	chromosome segregation	BUB1|BUB1B|CCNB1|CDC20|CENPE|CENPF|KIFC1|NEK2|TOP2A|TTK|AURKB|PTTG1|KIF23|ESPL1|DLGAP5|KIF14|NDC80|KIF2C|OIP5|NCAPH|KIF4A|NUSAP1|CDCA8|HJURP|KNL1|CENPK|NCAPG|FAM83D|NUF2|HASPIN|BRIP1|SPC24|SGO1|CDCA2|ESCO2|SKA1|SKA3
DNA Replication	node1	DNA Replication	Ccna2|Cdc45|Cdk2|E2f1|H3c14|H2ac18|Mcm2|Orc1|Pole2|Cdc6|Cdt1|Ube2c|Gins1|Mcm10|Ube2s|H4c14|H3c8|Gins4|E2f2|H3c7|Gins2|H3c10|H3c11|H2ac12|H2ac4|H2ac20|H2bc9|H2bc11|H2bc14|H2ac13|H2ac19|H4c1
DNA Replication	node2	DNA Replication Pre-Initiation	Cdc45|Cdk2|E2f1|H3c14|H2ac18|Mcm2|Orc1|Pole2|Cdc6|Cdt1|Mcm10|H4c14|H3c8|E2f2|H3c7|H3c10|H3c11|H2ac12|H2ac4|H2ac20|H2bc9|H2bc11|H2bc14|H2ac13|H2ac19|H4c1
DNA Replication	node3	Assembly of the ORC complex at the origin of replication	H3c14|H2ac18|Orc1|H4c14|H3c8|H3c7|H3c10|H3c11|H2ac12|H2ac4|H2ac20|H2bc9|H2bc11|H2bc14|H2ac13|H2ac19|H4c1
DNA Replication	node4	Deposition of new CENPA-containing nucleosomes at the centromere	Cenpa|H2ac18|Cenpk|Cenpw|Cenpm|Oip5|Cenpu|H4c14|Cenpi|H2ac12|H2ac4|H2ac20|H2bc9|H2bc11|H2bc14|H2ac13|H2ac19|H4c1|Hjurp
DNA Replication	node5	Nucleosome assembly	Cenpa|H2ac18|Cenpk|Cenpw|Cenpm|Oip5|Cenpu|H4c14|Cenpi|H2ac12|H2ac4|H2ac20|H2bc9|H2bc11|H2bc14|H2ac13|H2ac19|H4c1|Hjurp
DNA Replication	node6	NoRC negatively regulates rRNA expression	H3c14|H2ac18|H4c14|H3c8|H3c7|H3c10|H3c11|H2ac12|H2ac4|H2ac20|H2bc9|H2bc11|H2bc14|H2ac13|H2ac19|H4c1
DNA Replication	node7	Senescence-Associated Secretory Phenotype (SASP)	Ccna2|Cdk2|Cdk4|H3c14|H2ac18|Ube2c|Ube2s|H4c14|H3c8|H3c7|H3c10|H3c11|H2ac12|H2ac4|H2ac20|H2bc9|H2bc11|H2bc14|H2ac13|H2ac19|H4c1
DNA Replication	node8	SIRT1 negatively regulates rRNA expression	H3c14|H2ac18|H4c14|H3c8|H3c7|H3c10|H3c11|H2ac12|H2ac4|H2ac20|H2bc9|H2bc11|H2bc14|H2ac13|H2ac19|H4c1
DNA Replication	node9	RNA Polymerase I Promoter Opening	H3c14|H2ac18|H4c14|H3c8|H3c7|H3c10|H3c11|H2ac12|H2ac4|H2ac20|H2bc9|H2bc11|H2bc14|H2ac13|H2ac19|H4c1
DNA Replication	node10	Negative epigenetic regulation of rRNA expression	H3c14|H2ac18|H4c14|H3c8|H3c7|H3c10|H3c11|H2ac12|H2ac4|H2ac20|H2bc9|H2bc11|H2bc14|H2ac13|H2ac19|H4c1
microtubule cytoskeleton organization	node1	microtubule cytoskeleton organization	BRCA2|CAPN6|CCNB1|CDK1|CDC20|CDK2|CENPA|CENPE|FOXJ1|KIF11|KIFC1|MAD2L1|MYBL2|NEFL|NEK2|PLK1|STIL|AURKA|TTK|TUBA3C|WEE1|XRCC2|PRC1|CCNB2|AURKB|KIF23|ESPL1|PCLAF|DLGAP5|KIF20A|SPRY1|NDC80|TACC3|PLK4|KIF2C|TPX2|KIF4A|NUSAP1|JHY|NUF2|CCDC8|TUBB6|TUBA1C|DRC1|LRGUK|DNAAF6|SGO1|SPAG17|MAP7D2|ASPM|GAS2L3|WDR62|KIF4B|MCIDAS|RSPH4A|CFAP100|CFAP73|HOATZ|STMND1
microtubule cytoskeleton organization	node2	mitotic spindle organization	CCNB1|CDC20|CENPE|KIF11|KIFC1|MYBL2|NEK2|PLK1|STIL|AURKA|TTK|PRC1|AURKB|KIF23|DLGAP5|NDC80|TACC3|TPX2|KIF4A|NUF2|WDR62|KIF4B
microtubule cytoskeleton organization	node3	mitotic spindle assembly	CDC20|KIF11|KIFC1|MYBL2|NEK2|PRC1|AURKB|KIF23|TPX2|KIF4A|KIF4B
microtubule cytoskeleton organization	node4	microtubule cytoskeleton organization involved in mitosis	CCNB1|CDC20|CENPA|CENPE|KIF11|KIFC1|MAD2L1|MYBL2|NEK2|PLK1|STIL|AURKA|TTK|PRC1|AURKB|KIF23|ESPL1|DLGAP5|SPRY1|NDC80|TACC3|TPX2|KIF4A|NUSAP1|NUF2|WDR62|KIF4B
microtubule cytoskeleton organization	node5	non-membrane-bounded organelle assembly	CDC20|CDK2|CENPA|CENPE|CENPF|NKX2-5|FLNC|KIF11|KIFC1|MYBL2|NEK2|AURKA|TNNT2|PRC1|CCNB2|AURKB|KIF23|DLGAP5|NDC80|PLK4|TPX2|KIF4A|CENPK|ASPM|WDR62|KIF4B|MCIDAS|CENPW
microtubule cytoskeleton organization	node6	spindle assembly	CDC20|KIF11|KIFC1|MYBL2|NEK2|AURKA|PRC1|CCNB2|AURKB|KIF23|NDC80|TPX2|KIF4A|ASPM|KIF4B
microtubule cytoskeleton organization	node7	spindle organization	CCNB1|CDC20|CENPE|KIF11|KIFC1|MYBL2|NEK2|PLK1|STIL|AURKA|TTK|PRC1|CCNB2|AURKB|KIF23|ESPL1|DLGAP5|NDC80|TACC3|TPX2|KIF4A|NUF2|ASPM|WDR62|KIF4B
microtubule cytoskeleton organization	node8	microtubule-based process	BRCA2|CAPN6|CCNB1|CDK1|CDC20|CDK2|CENPA|CENPE|FOXJ1|KIF11|KIFC1|MAD2L1|SMCP|MYBL2|NEFL|NEK2|PGK2|PLK1|STIL|AURKA|TTK|TUBA3C|WEE1|XRCC2|DNAH11|CACNA1I|PRC1|CCNB2|AURKB|KIF23|ESPL1|PCLAF|DLGAP5|KIF14|KIF20A|SPRY1|NDC80|TACC3|PLK4|KIF2C|TPX2|KIF4A|CFAP45|CALY|NUSAP1|GTSE1|KIF15|JHY|NUF2|TEKT1|ROPN1L|CCDC8|TUBB6|TUBA1C|DRC1|KIF12|CATSPER1|LRGUK|DNAAF6|SGO1|DYNLT5|SPAG17|MAP7D2|ASPM|GAS2L3|WDR62|KIF4B…
microtubule cytoskeleton organization	node9	organelle assembly	CDC20|CDK2|CENPA|CENPE|CENPF|NKX2-5|FOXJ1|FLNC|KIF11|KIFC1|MYBL2|NEK2|PLA2G5|AURKA|TNNT2|PRC1|CCNB2|AURKB|KIF23|DLGAP5|NDC80|PLK4|RAB32|TPX2|RAB38|KIF4A|KNL1|CENPK|JHY|TEKT1|RAB34|DRC1|LRGUK|DNAAF6|CFAP161|SPAG17|ASPM|WDR62|KIF4B|CIBAR2|MCIDAS|RSPH4A|CFAP100|CENPW|CFAP73|HOATZ|MAP1LC3C|GMNC
meiotic cell cycle	node1	meiotic cell cycle process	BUB1|BUB1B|EREG|RAD51|AURKA|TOP2A|TTK|RAD54L|CCNB2|PTTG1|ESPL1|NDC80|NCAPH|NUF2|BRIP1|MND1|SGO1|ASPM
meiotic cell cycle	node2	meiotic nuclear division	BUB1|BUB1B|EREG|RAD51|AURKA|TOP2A|TTK|RAD54L|CCNB2|PTTG1|ESPL1|NDC80|NCAPH|NUF2|BRIP1|MND1|SGO1|ASPM
meiotic cell cycle	node3	meiotic chromosome segregation	BUB1|BUB1B|TOP2A|TTK|PTTG1|ESPL1|NCAPH|NUF2|BRIP1|SGO1
meiotic cell cycle	node4	meiotic cell cycle	BUB1|BUB1B|EREG|NEK2|RAD51|AURKA|TOP2A|TTK|RAD54L|CCNB2|EXO1|PTTG1|ESPL1|NDC80|RAD51AP1|NCAPH|NUF2|BRIP1|MND1|H1-8|SGO1|ASPM
meiotic cell cycle	node5	meiosis I	RAD51|AURKA|TOP2A|RAD54L|CCNB2|PTTG1|ESPL1|NDC80|BRIP1|MND1|SGO1
meiotic cell cycle	node6	meiosis I cell cycle process	RAD51|AURKA|TOP2A|RAD54L|CCNB2|PTTG1|ESPL1|NDC80|BRIP1|MND1|SGO1
meiotic cell cycle	node7	female meiotic nuclear division	EREG|AURKA|TOP2A|TTK|CCNB2|NDC80|NCAPH
meiotic cell cycle	node8	meiotic spindle organization	AURKA|CCNB2|ESPL1|NDC80|ASPM
meiotic cell cycle	node9	meiotic spindle assembly	AURKA|CCNB2|NDC80|ASPM
meiotic cell cycle	node10	spindle assembly involved in female meiosis I	AURKA|CCNB2|NDC80
